# Supplementary material
Source: publisher figshare collection journal article supplement (https://acs.figshare.com/ndownloader/files/21755085)
Supplement: Supplementary file 1 [file 21755085]

## Supplementary Information

# Cholesterol Two-Dimensional Immiscible Domain in Lipid Bilayer Membrane Promotes Early Stage Calcification by Inducing Oriented Nucleation of Hydroxyapatite

Jie Jing <sup>1,2</sup>, Xuanyu Chen <sup>1,2</sup>, Zhiping Meng <sup>1,2</sup>, Wenqiang Su <sup>1,2</sup>, Yonghai Liu <sup>1,2</sup>, Yue Zhang <sup>1,2</sup>, Huaxu Zhu <sup>1,2,3</sup>, Weiwei Yao <sup>1</sup>, Tingming Fu <sup>\*1,2,3</sup>

<sup>1</sup>School of Pharmacy, Nanjing University of Chinese Medicine, Nanjing, China, 210023

<sup>2</sup> Jiangsu Botanical Medicine Refinement Engineering Research Center, Nanjing, China, 210023

<sup>3</sup> Jiangsu Collaborative Innovation Center of Chinese Medicinal Resources Industrialization, Nanjing, China, 210023

\*Corresponding authors: Tingming Fu

Emails: [futm@njucm.edu.cn](mailto:futm@njucm.edu.cn)

## CONTENTS

**Figure S1.** Supplementary SEM pictures of LBM1 (a, b), LBM2 (c, d), LBM3 (e, f) and LBM4 (g, h) after incubation for 1 day (left two columns) and 5days (right two columns). Two photographs in parallel were given for each sample, named 1 and 2 respectively. The scale bar is 100nm.

**Figure S2.** SEM (A), EDX mapping (B-C), TEM (E) and SEAD (F) of LBM4 after 12 hours of incubation, G is the abundance distribution of calcium (Ca), phosphorus (P) and oxygen (O) calculated from EDX mapping

**Figure S3.** Supplementary TEM pictures of LBM2 (A, B) after incubation for 5 hours and LBM3(C, D) after incubation for 12hours.

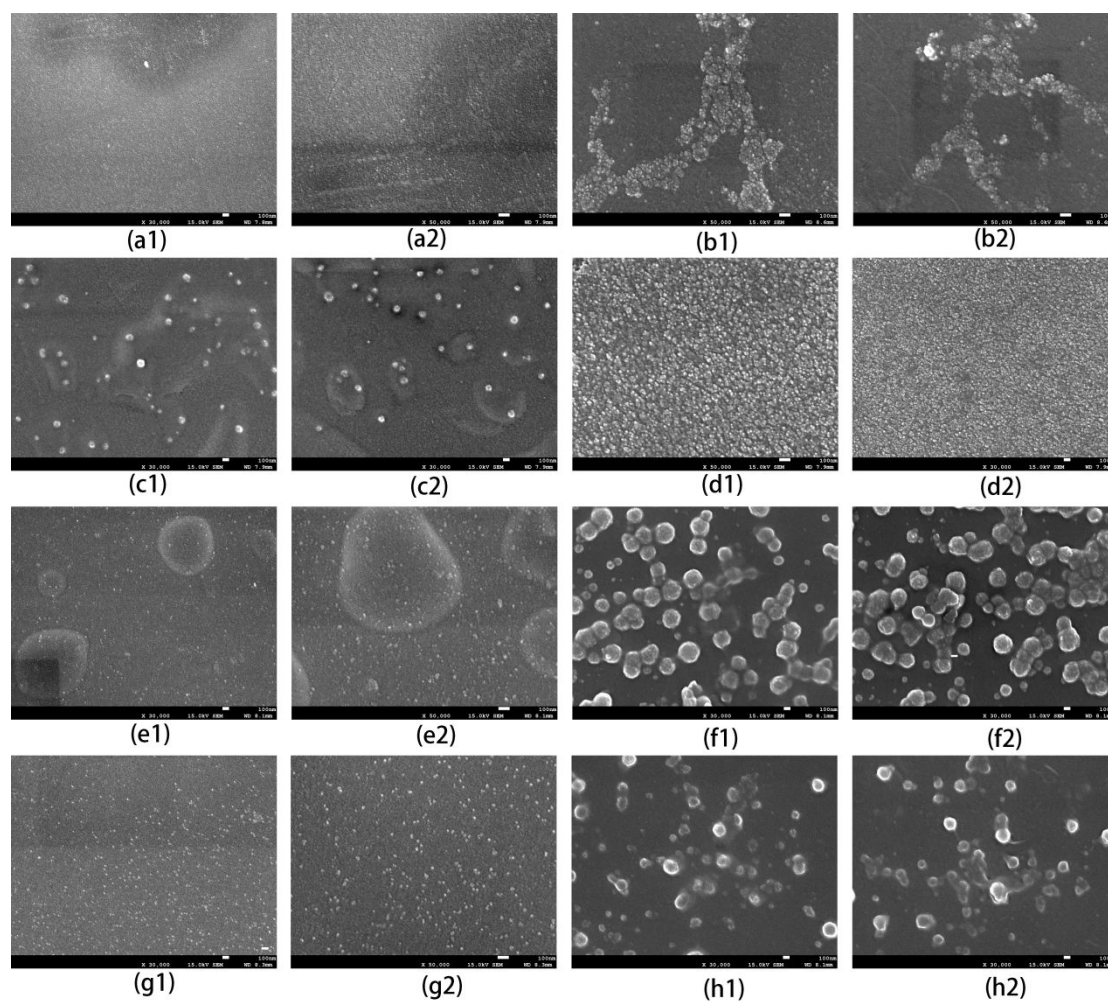

**Figure S1.** Supplementary SEM pictures of LBM1 (a, b), LBM2 (c, d), LBM3 (e, f) and LBM4 (g, h) after incubation for 1 day (left two columns) and 5days (right two columns). Two photographs in parallel were given for each sample, named 1 and 2 respectively. The scale bar is 100nm.

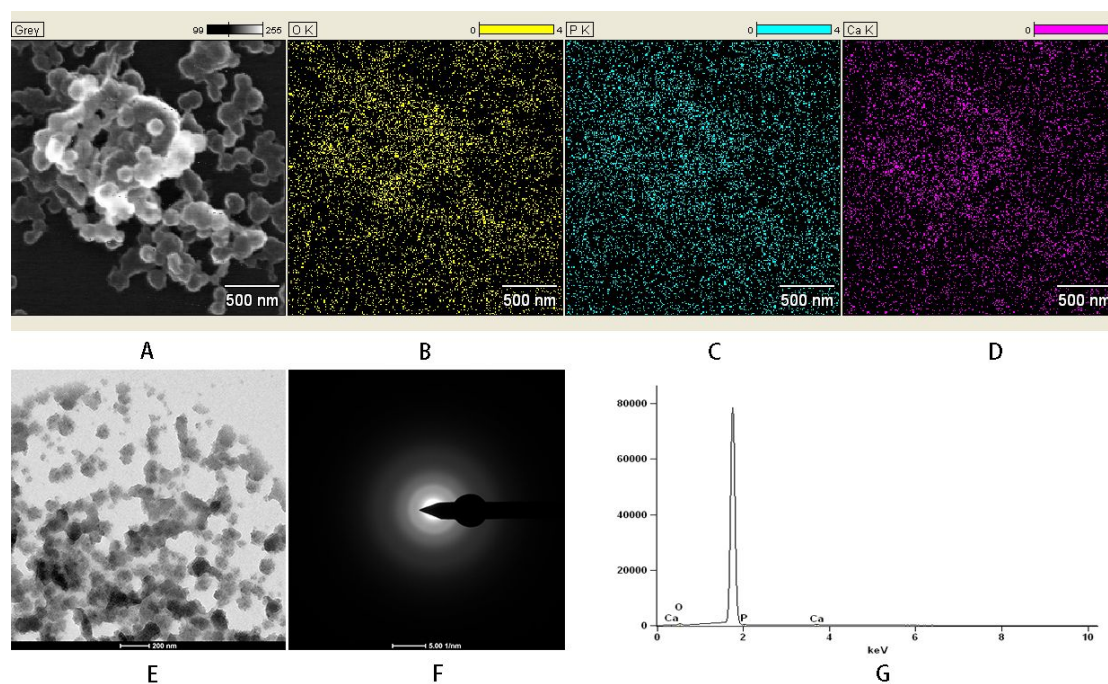

**Figure S2.** SEM (A), EDX mapping (B-C), TEM (E) and SEAD (F) of LBM4 after 12 hours of incubation, G is the abundance distribution of calcium (Ca), phosphorus (P) and oxygen (O) calculated from EDX mapping. From the above pictures, it was found that there was no oriented deposition of calcium phosphate in LBM4. The calcium phosphate was clustered and polycrystalline diffraction ring appeared. The calcium-phosphorus ratio was about 1.5, indicating that the sediments were hydroxyapatite. The increase of P might be due to the fact that phospholipids also contained phosphorus. The distribution of P is more uniform than Ca, which can be seen from figureS1 C.

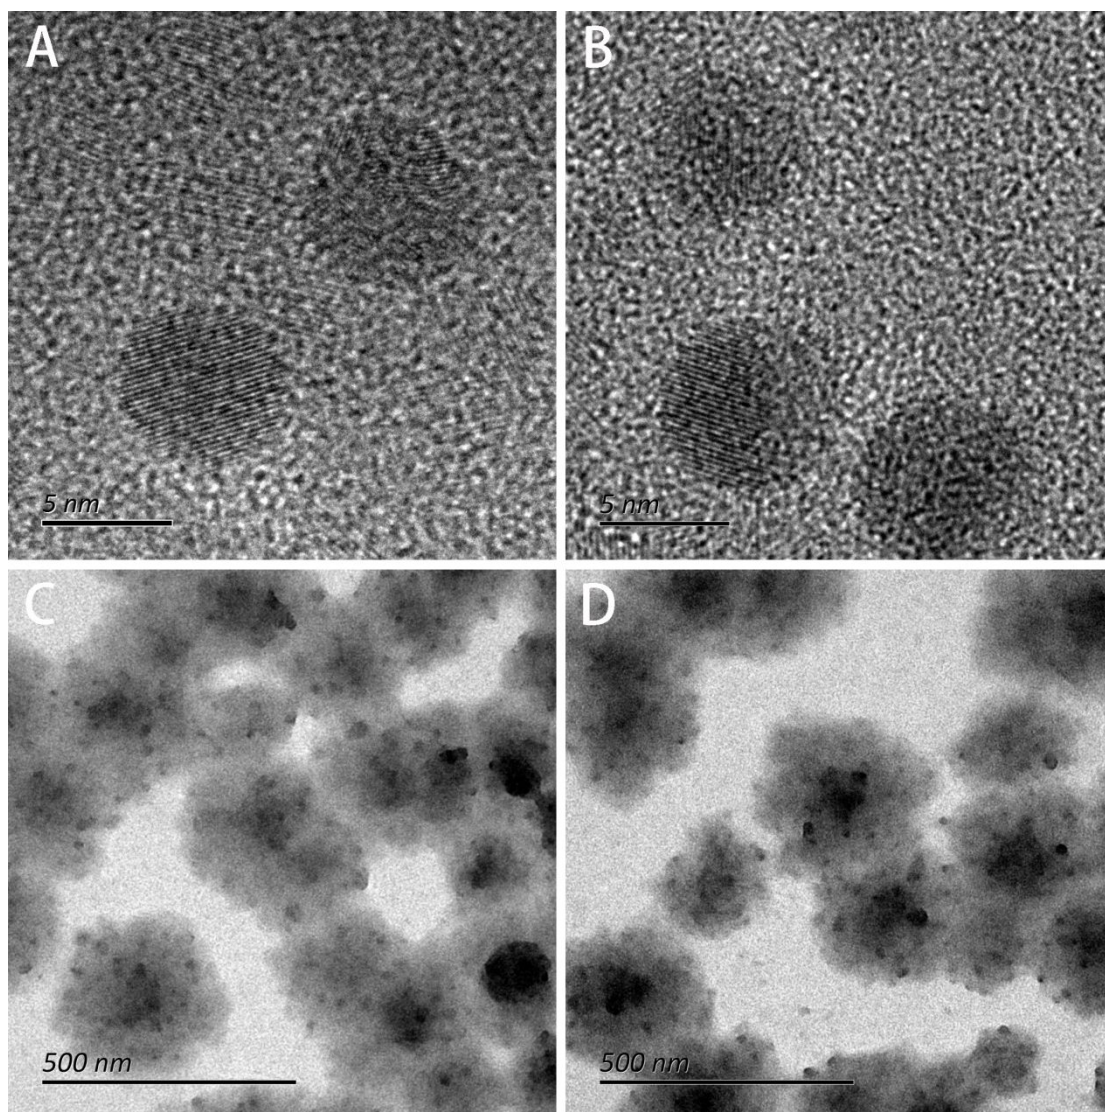

**Figure S3.** Supplementary TEM pictures of LBM2 (A, B) after incubation for 5 hours and LBM3(C, D) after incubation for 12hours.
